# Supplementary material for: Are ab initio quantum chemistry methods able to predict vibrational states up to the dissociation limit for multi-electron molecules close to spectroscopic accuracy?
Source: Royal Society of Chemistry journal article supplement (doi:10.1039/c0cp01334j), 2010-12-22
Supplement: c0cp01334j.pdf [file c0cp01334j.pdf]

Supplementary\_Electronic\_Information\_PCCP.txt

Supplementary Electronic Information  
for the paper:

"Are ab initio quantum chemistry methods able to predict vibrational states up to the dissociation limit for multi-electron molecules close to spectroscopic accuracy?"

by

Peter G. Szalay(c), Filip Holka (a,b), Julien Fremont (a), Michael Rey (a),  
Kirk A. Peterson (d)  
and Vladimir G. Tyuterev (a)

a Groupe de Spectrométrie Moléculaire et Atmosphérique, Reims University,  
F-51687, Reims Cedex 2, France. Fax: +33 326913147; E-mail:  
vladimir.tyuterev@univ-reims.fr

b Faculty of Materials Science and Technology, Slovak University of Technology,  
Paulínska 16, 917 24 Trnava, Slovak Republic.

a Institute of Chemistry, Eötvös Loránd University, H-1117, Budapest, Hungary.  
Fax: +36-1-372-2592; E-mail: szalay@chem.elte.hu

d Department of Chemistry, Washington State University, Pullman, Washington  
99164-4630, USA.

Table A1

Potential energy curve data used to produce the final vibrational levels of LiH. The function is composed of the B0 (calculated at the MRCISD+QP/(56) level), MVD relativistic correction (obtained at icMR-CISD/cc-pwCV5Z level) and DBOC (calculated at the MRCISD/cc-pwCVTZ level) contributions.

| R    | PEC (final) |
|------|-------------|
| Bohr | (Hartree)   |

|       |             |
|-------|-------------|
| 1.850 | -7.96651541 |
| 1.875 | -7.97298958 |
| 1.900 | -7.97913828 |
| 1.925 | -7.98497334 |
| 1.950 | -7.99051096 |
| 1.975 | -7.99576266 |
| 2.000 | -8.00074224 |
| 2.025 | -8.00546043 |
| 2.050 | -8.00992964 |
| 2.075 | -8.01416162 |
| 2.100 | -8.01816503 |
| 2.130 | -8.02268399 |
| 2.150 | -8.02553007 |
| 2.160 | -8.02690550 |
| 2.200 | -8.03209955 |
| 2.230 | -8.03568801 |
| 2.250 | -8.03794235 |
| 2.260 | -8.03902945 |
| 2.300 | -8.04312099 |
| 2.350 | -8.04769282 |
| 2.400 | -8.05170994 |
| 2.450 | -8.05522046 |
| 2.500 | -8.05826790 |
| 2.550 | -8.06089203 |
| 2.600 | -8.06312939 |
| 2.650 | -8.06501339 |
| 2.700 | -8.06657411 |
| 2.750 | -8.06784009 |
| 2.800 | -8.06883697 |
| 2.850 | -8.06958796 |
| 2.900 | -8.07011467 |
| 2.950 | -8.07043677 |
| 3.000 | -8.07057275 |
| 3.050 | -8.07053903 |
| 3.100 | -8.07035117 |
| 3.150 | -8.07002304 |

Supplementary\_Electronic\_Information\_PCCP.txt

3. 200 -8. 06956768  
3. 250 -8. 06899685  
3. 300 -8. 06832148  
3. 350 -8. 06755190  
3. 400 -8. 06669691  
3. 450 -8. 06576526  
3. 500 -8. 06476453  
3. 550 -8. 06370204  
3. 600 -8. 06258442  
3. 650 -8. 06141773  
3. 700 -8. 06020785  
3. 750 -8. 05895944  
3. 800 -8. 05767744  
3. 850 -8. 05636642  
3. 900 -8. 05503034  
3. 950 -8. 05367264  
4. 000 -8. 05229724  
4. 050 -8. 05090708  
4. 100 -8. 04950478  
4. 150 -8. 04809340  
4. 200 -8. 04667518  
4. 250 -8. 04525238  
4. 300 -8. 04382752  
4. 350 -8. 04240206  
4. 400 -8. 04097797  
4. 450 -8. 03955675  
4. 500 -8. 03814015  
4. 550 -8. 03672948  
4. 600 -8. 03532610  
4. 650 -8. 03393096  
4. 700 -8. 03254534  
4. 750 -8. 03117027  
4. 800 -8. 02980640  
4. 850 -8. 02845527  
4. 900 -8. 02711701  
4. 950 -8. 02579260  
5. 000 -8. 02448267  
5. 050 -8. 02318807  
5. 100 -8. 02190911  
5. 150 -8. 02064651  
5. 200 -8. 01940086  
5. 250 -8. 01817231  
5. 300 -8. 01696179  
5. 350 -8. 01576933  
5. 400 -8. 01459555  
5. 450 -8. 01344053  
5. 500 -8. 01230490  
5. 550 -8. 01118887  
5. 600 -8. 01009272  
5. 650 -8. 00901699  
5. 700 -8. 00796146  
5. 750 -8. 00692679  
5. 800 -8. 00591280  
5. 850 -8. 00492067  
5. 900 -8. 00394891  
5. 950 -8. 00299941  
6. 000 -8. 00207132  
6. 050 -8. 00116559  
6. 100 -8. 00028121  
6. 150 -7. 99941928  
6. 200 -7. 99857926  
6. 250 -7. 99776192  
6. 300 -7. 99696681  
6. 350 -7. 99619384  
6. 400 -7. 99544347  
6. 450 -7. 99471506  
6. 500 -7. 99400902  
6. 550 -7. 99332499

Supplementary\_Electronic\_Information\_PCCP.txt

6.600 -7.99266299  
6.650 -7.99202277  
6.700 -7.99140428  
6.750 -7.99080819  
6.800 -7.99023233  
6.850 -7.98967751  
6.900 -7.98914325  
6.950 -7.98862872  
7.000 -7.98813470  
7.050 -7.98766068  
7.100 -7.98720465  
7.150 -7.98676856  
7.200 -7.98634943  
7.250 -7.98594962  
7.300 -7.98556634  
7.350 -7.98519915  
7.400 -7.98484892  
7.450 -7.98451442  
7.500 -7.98419494  
7.550 -7.98389066  
7.600 -7.98360004  
7.650 -7.98332406  
7.700 -7.98306043  
7.750 -7.98280832  
7.800 -7.98257018  
7.850 -7.98234375  
7.900 -7.98212763  
7.950 -7.98192267  
8.000 -7.98172764  
8.050 -7.98154240  
8.100 -7.98136658  
8.150 -7.98119950  
8.200 -7.98104084  
8.250 -7.98089027  
8.300 -7.98074735  
8.350 -7.98061178  
8.400 -7.98048315  
8.450 -7.98035945  
8.500 -7.98024381  
8.550 -7.98013424  
8.600 -7.98003020  
8.650 -7.97993139  
8.700 -7.97983790  
8.750 -7.97974923  
8.800 -7.97966509  
8.850 -7.97958407  
8.900 -7.97950862  
8.950 -7.97943740  
9.000 -7.97936962  
9.050 -7.97930507  
9.100 -7.97924418  
9.150 -7.97918618  
9.200 -7.97913155  
9.250 -7.97907951  
9.300 -7.97903046  
9.350 -7.97898381  
9.400 -7.97893978  
9.450 -7.97889784  
9.500 -7.97885827  
9.550 -7.97882067  
9.600 -7.97878510  
9.650 -7.97875128  
9.700 -7.97871932  
9.750 -7.97868899  
9.800 -7.97866024  
9.850 -7.97863270  
9.900 -7.97860710  
9.950 -7.97858282

Supplementary\_Electronic\_Information\_PCCP.txt

10.000 -7.97855936  
10.050 -7.97853749  
10.100 -7.97851632  
10.150 -7.97849675  
10.200 -7.97847765  
10.250 -7.97846000  
10.300 -7.97844289  
10.350 -7.97842700  
10.400 -7.97841161  
10.450 -7.97839723  
10.500 -7.97838348  
10.550 -7.97837052  
10.600 -7.97835811  
10.650 -7.97834643  
10.700 -7.97833525  
10.750 -7.97832471  
10.800 -7.97831467  
10.850 -7.97830500  
10.900 -7.97829587  
10.950 -7.97828727  
11.000 -7.97827928  
11.050 -7.97827153  
11.100 -7.97826419  
11.150 -7.97825720  
11.200 -7.97825058  
11.250 -7.97824425  
11.300 -7.97823824  
11.350 -7.97823254  
11.400 -7.97822714  
11.450 -7.97822200  
11.500 -7.97821710  
11.550 -7.97821243  
11.600 -7.97820802  
11.650 -7.97820381  
11.700 -7.97819982  
11.750 -7.97819599  
11.800 -7.97819225  
11.850 -7.97818882  
11.900 -7.97818565  
11.950 -7.97818242  
12.000 -7.97817946  
12.100 -7.97817396  
12.200 -7.97816895  
12.300 -7.97816444  
12.400 -7.97816031  
12.500 -7.97815659  
12.600 -7.97815303  
12.700 -7.97815009  
12.800 -7.97814715  
12.900 -7.97814470  
13.000 -7.97814200  
13.100 -7.97814025  
13.200 -7.97813800  
13.300 -7.97813642  
13.400 -7.97813457  
13.500 -7.97813286  
13.600 -7.97813193  
13.700 -7.97813054  
13.800 -7.97812945  
13.900 -7.97812836  
14.000 -7.97812730  
14.100 -7.97812631  
14.200 -7.97812548  
14.300 -7.97812504  
14.400 -7.97812429  
14.500 -7.97812358  
14.600 -7.97812291  
14.700 -7.97812237

Supplementary\_Electronic\_Information\_PCCP.txt

14.800 -7.97812188  
14.900 -7.97812145  
15.000 -7.97812101
